# Supplementary figures and images for: Propane dehydrogenation over PtZn localized at Ti sites on TS-1 zeolite
Source: Royal Society of Chemistry journal article supplement (doi:10.1039/d1cy00470k), 2021-01-01

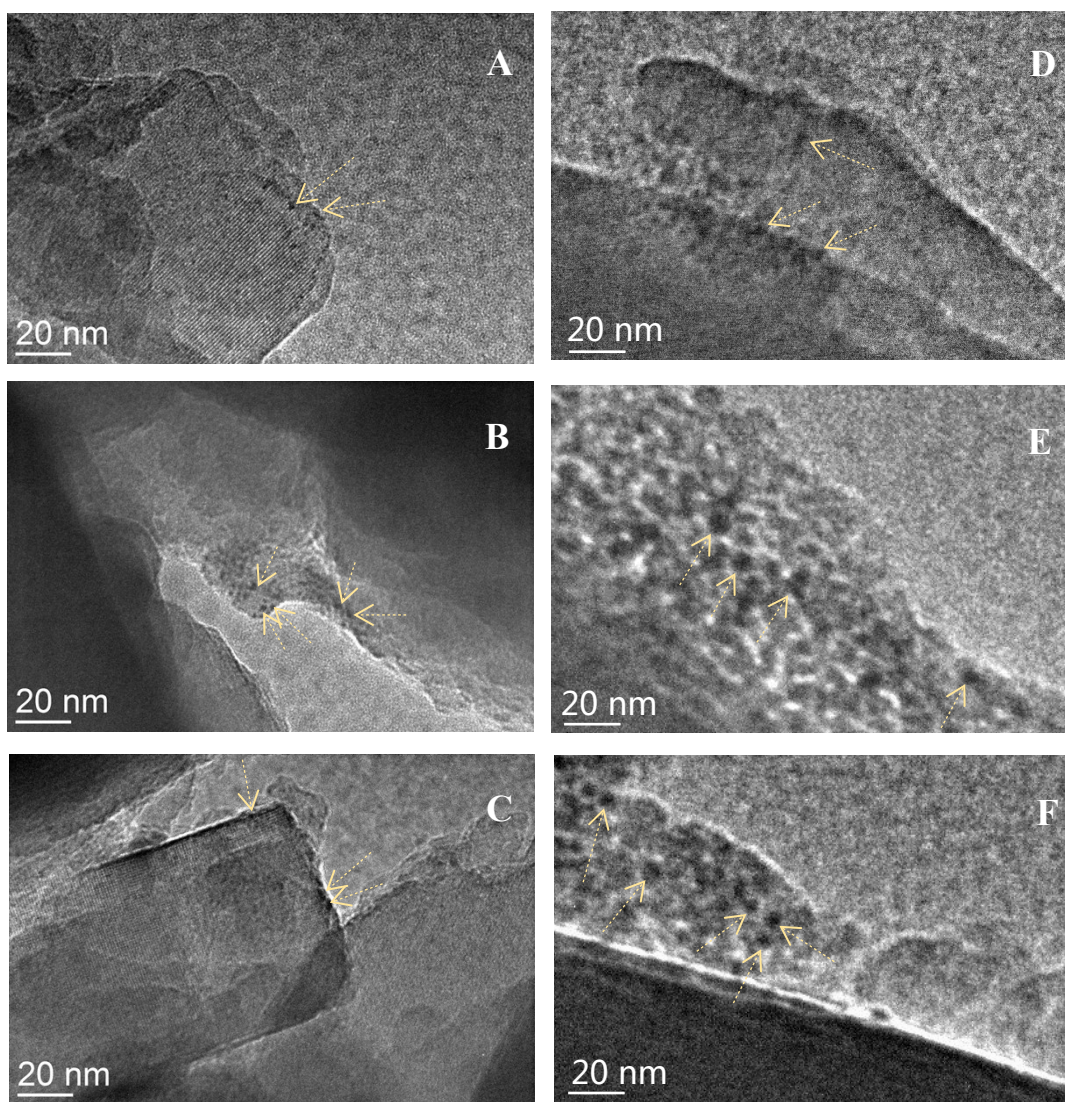

Fig. S1. The TEM images of the PtZn/0.02TS-95 (A, B, C) and PtZn/S-95 (D, E, F).

Supplement: d1cy00470k1.pdf [file d1cy00470k1.pdf]
